# Supplementary figures and images for: Characterising the autoantibody repertoire in systemic sclerosis following myeloablative haematopoietic stem cell transplantation
Source: HighWire-hosted journal article supplement (doi:10.1136/ard-2021-221926), 2023-01-18

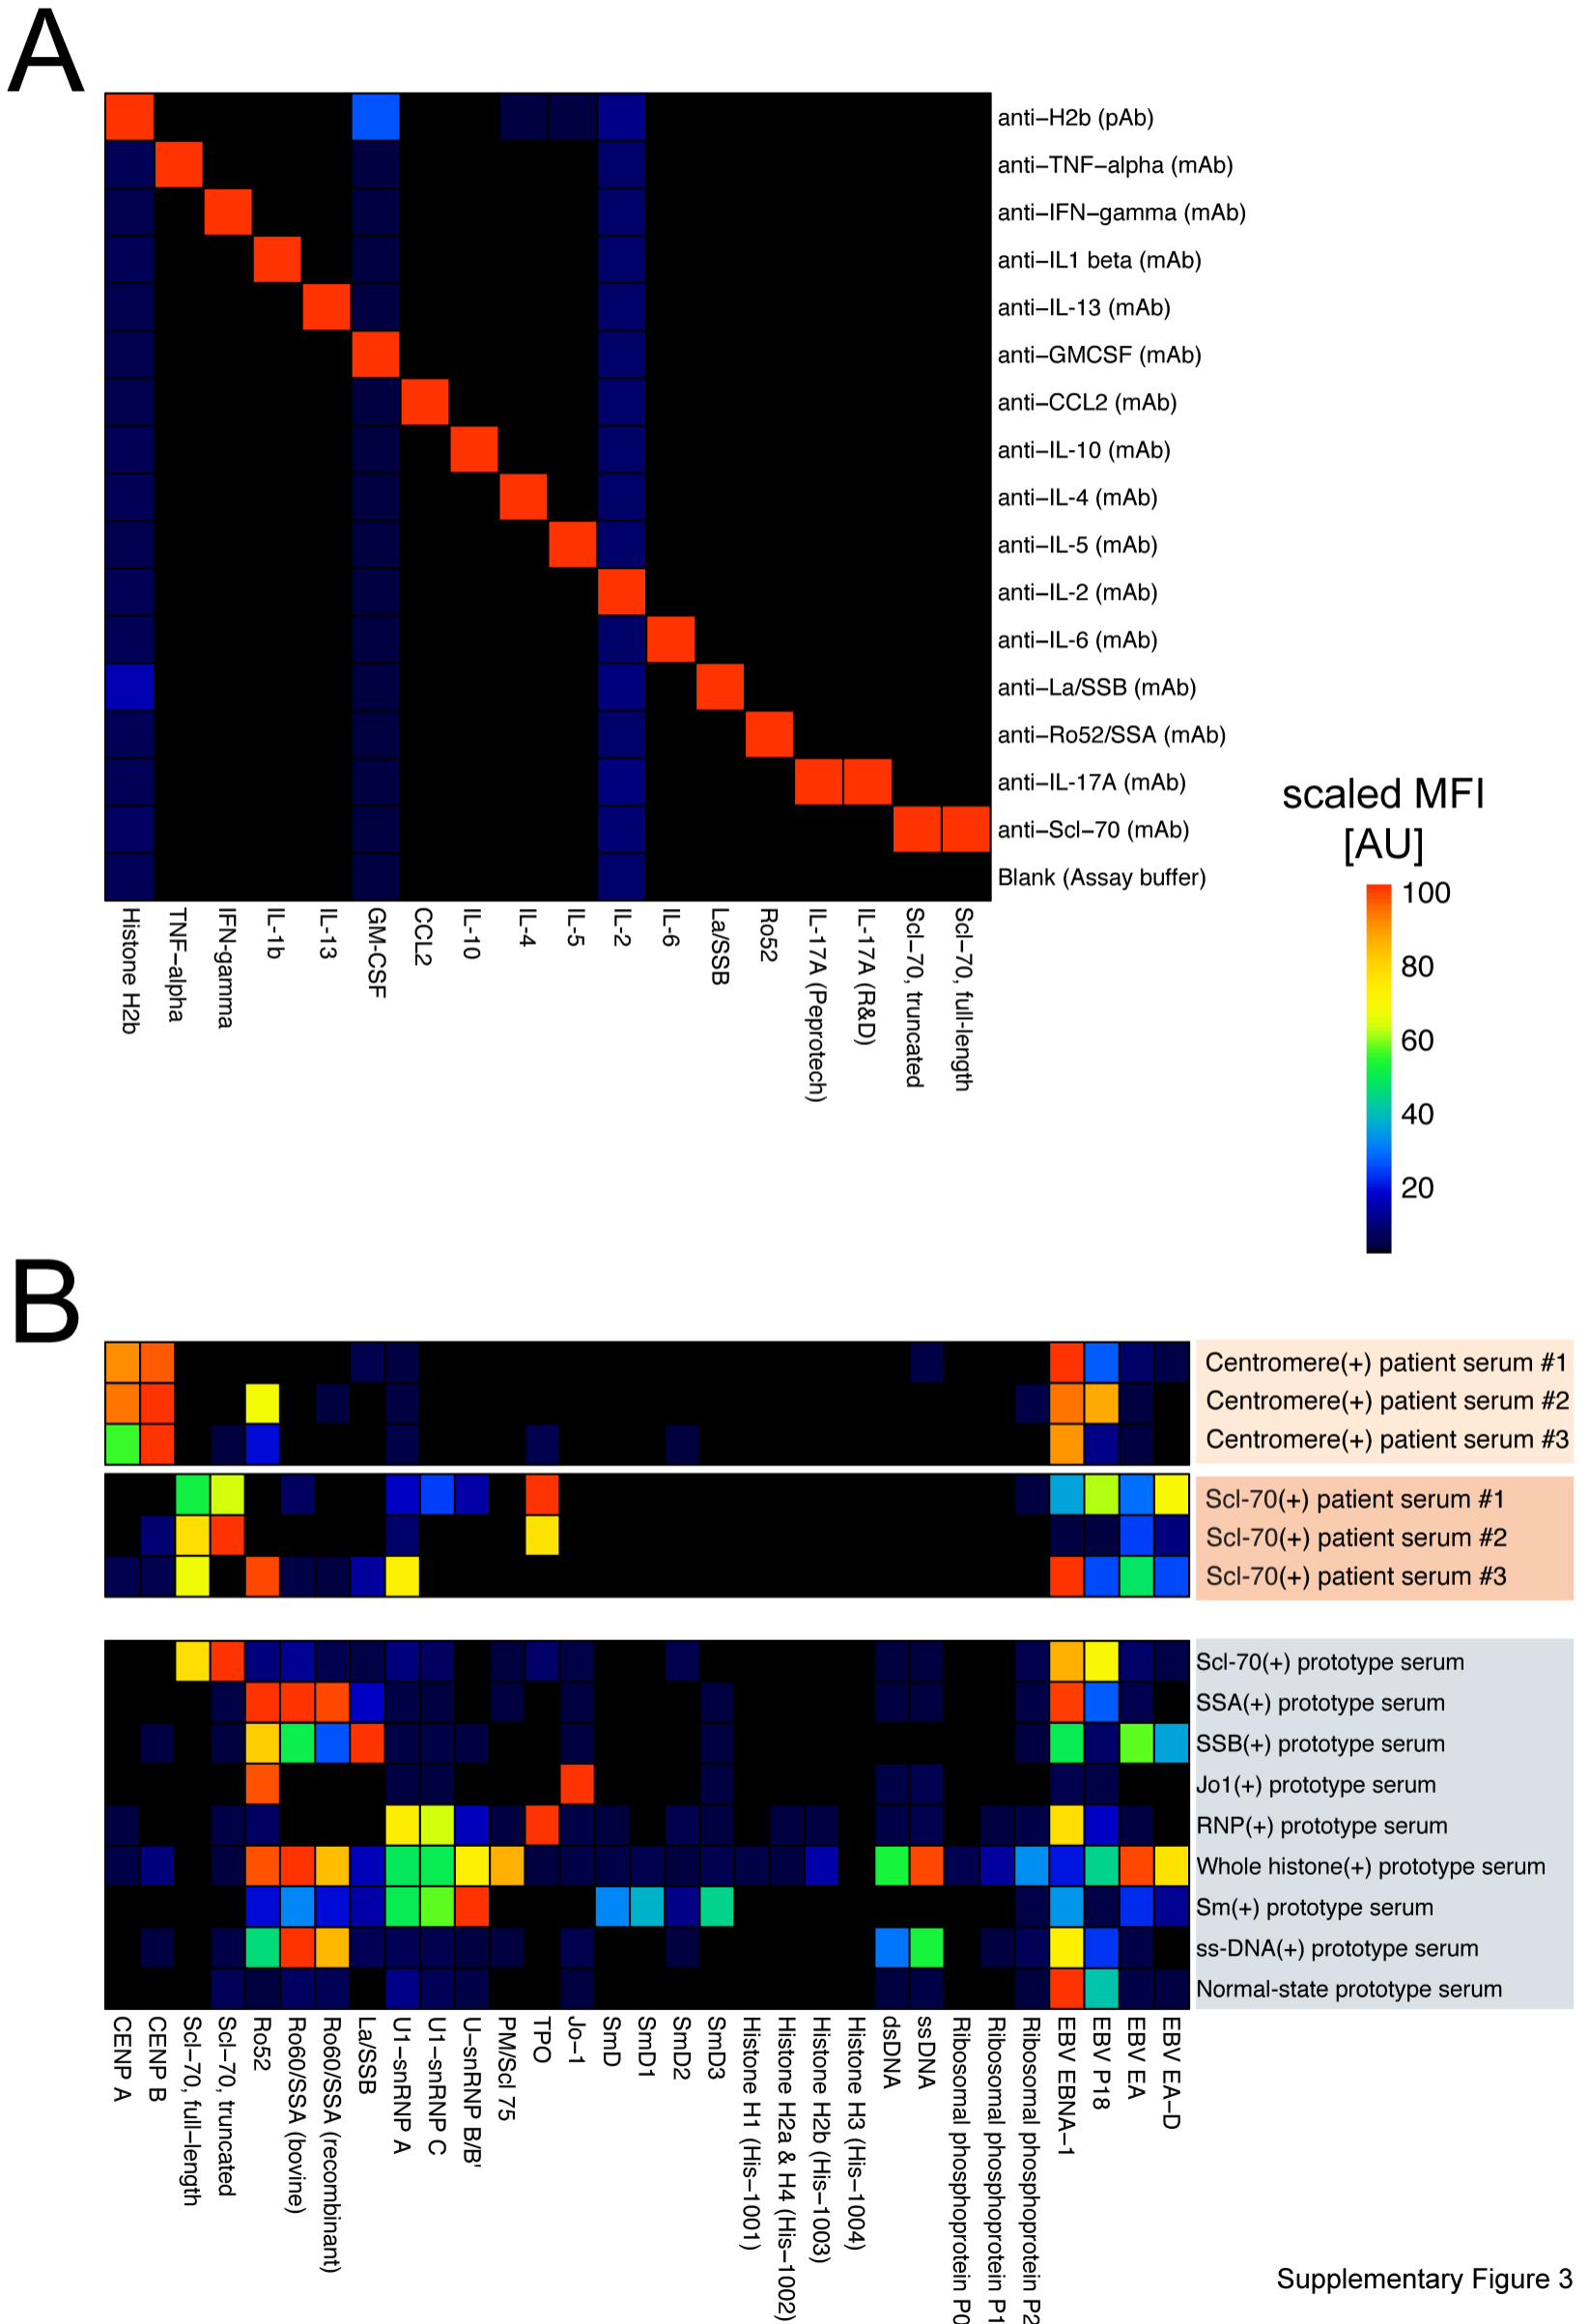

Supplementary Figure 3

Supplement: ard-2021-221926supp012_data_supplement.pdf [file ard-2021-221926supp012_data_supplement.pdf]
